# Supplementary material
Source: Springer Nature journal article supplement (https://www.springermedizin.de/resource/supplementary/13058_2007_1646_MOESM2_ESM.pdf/9699614)
Supplement: MOESM2 [file 9699614]

# Figure 1S

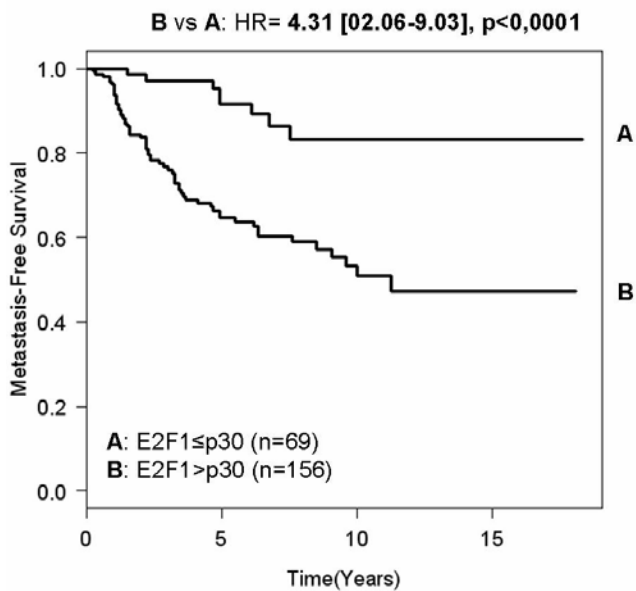

**A**

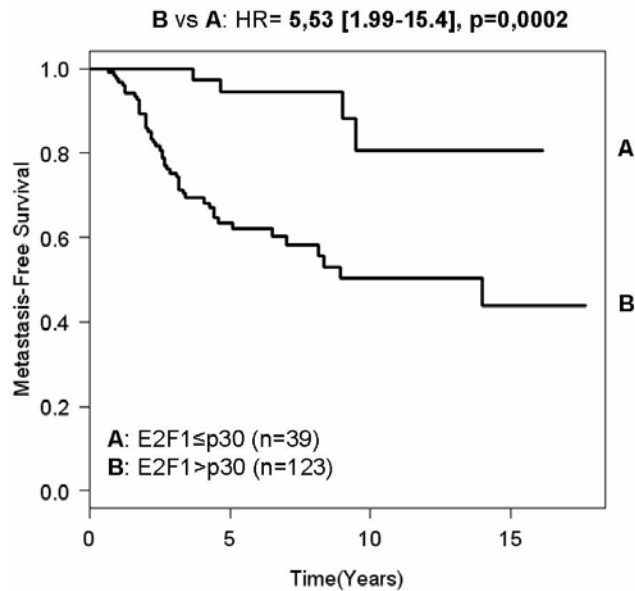

**C**

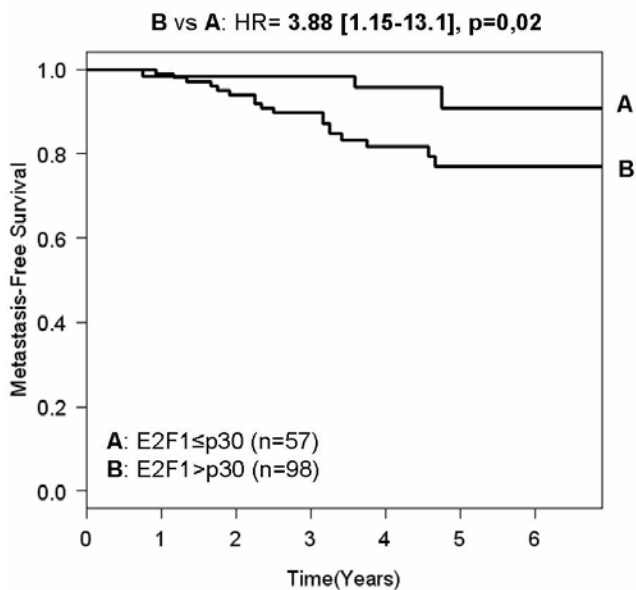

**B**

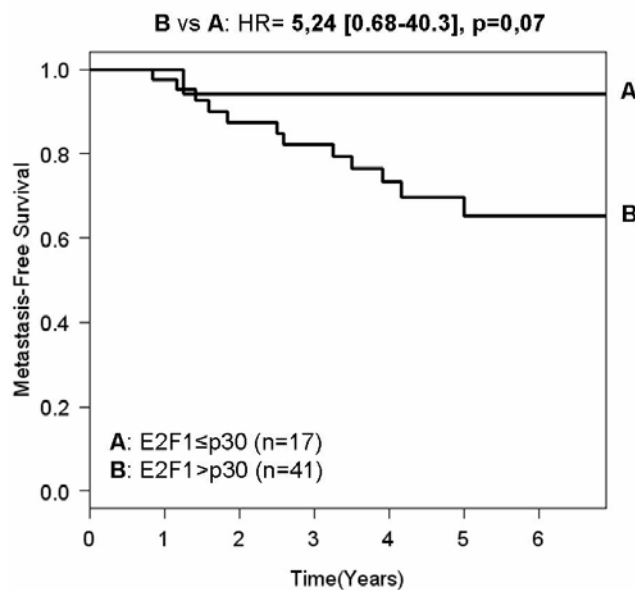

**D**
